# Supplementary material
Source: Springer Nature journal article supplement (https://www.springermedizin.de/resource/supplementary/12960_2003_12_MOESM2_ESM.pdf/9569728)

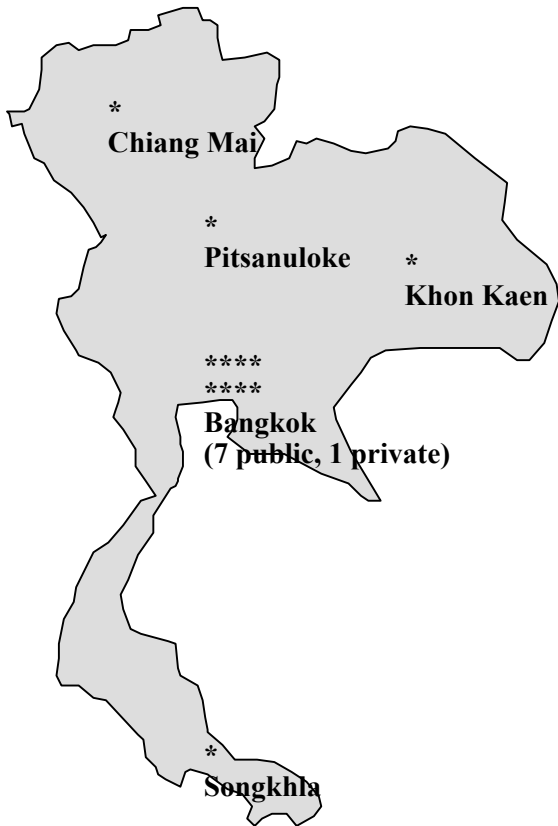

Supplement: MOESM2 [file 9569728]
